# Supplementary material for: Spatial Planning of Electric Vehicle Infrastructure for Belo Horizonte, Brazil
Source: Hindawi journal article supplement (doi:10.1155/2018/8923245), 2018-12-19
Supplement: f1 [file 8923245.f1.pdf]

## Supplementary Materials

Table A1: Explanation of Attributes

| Attr  | Explanation                                                                                                             |
|-------|-------------------------------------------------------------------------------------------------------------------------|
| Inc   | Total of permanent households with monthly nominal income per capita equal or higher then US\$ 2,200 per month          |
| Dens  | Population density older than or equal to 18 years                                                                      |
| PTra  | Public transportation with 50 or more parking spaces                                                                    |
| PShop | Shopping centers with parking lot for at least 50 vehicles                                                              |
| Dcia  | Workplace: areas with at least 50 organizations                                                                         |
| PPP   | Roads, corridors and avenues connecting with inter-municipal, interstate highways and two or more neighborhoods         |
| PGeo  | Geohazard: restricted areas for construction                                                                            |
| PWat  | Flooding: areas subjected to risk of flooding                                                                           |
| Slop  | Slope greater than 25 degrees                                                                                           |
| Rest  | Green areas: In land use planning, urban open space is open space areas for "parks", "green spaces", and other          |
| Rest  | Water bodies: is any significant accumulation of water on a planet's surface                                            |
| Rest  | Subnormal agglomerates: Cluttered and dense poor settlements, most lacking basic urban utilities and essential services |

Table A2: Technical specifications of the charging equipment levels

| Level                                                 | Typical Use        | Energy interface   | Power Level                               | Charge Time                            |
|-------------------------------------------------------|--------------------|--------------------|-------------------------------------------|----------------------------------------|
| EVCS_L1 AC<br>120 V<br>EVCS 1 DC<br>200 - 450 V       | Home or Office     | Convenience outlet | Up to 2 kW<br>$\leq 20\text{kW}$          | 12 to 18 hours                         |
| EVCS_L2 AC<br>240 V<br>EVCS 2 DC<br>200 V– 450 V      | Dedicated Outlets  | Dedicated outlet   | $\leq 20\text{ kW}$<br>$\leq 80\text{kW}$ | 3 to 8 hours<br>From 20 min to 7 hours |
| EVCS_L3 AC<br>Undefined<br>EVCS 3 DC<br>200 V – 450 V | Commercial Station | Dedicated EVSE     | 50 – 100 kW<br>~120 Kw                    | Less than 30 minutes                   |

Source: (EPA 2017)
